# Supplementary material
Source: Springer Nature journal article supplement (https://www.springermedizin.de/resource/supplementary/12879_2005_260_MOESM1_ESM.pdf/9448300)
Supplement: MOESM1 [file 9448300]

**Table 1** Associations of soci-demographic and health service factors with health providers' delay

| Characteristics              | Delay<br>>62 days | No delay<br>≤61 days | Crude<br>OR (95%CI) | Adjusted<br>OR (95%CI) |
|------------------------------|-------------------|----------------------|---------------------|------------------------|
| <b>Sex</b>                   |                   |                      |                     |                        |
| Male                         | 94                | 108                  | 1.00                | 1.00                   |
| Female                       | 96                | 86                   | 1.39 (0.93, 2.08)   | 0.89 (0.51, 1.53)      |
| <b>Age</b>                   |                   |                      |                     |                        |
| 15-24                        | 47                | 80                   | 1.00                | 1.00                   |
| 25-44                        | 119               | 97                   | 0.20 (1.33, 3.27) * | 2.04 (1.21, 3.4) *     |
| >45                          | 24                | 17                   | 2.40 (1.17, 4.92) * | 2.02 (0.88, 4.60)      |
| <b>Residence</b>             |                   |                      |                     |                        |
| >10Km                        | 110               | 58                   | 1.00                | 1.00                   |
| ≤10Km                        | 80                | 136                  | 0.31 (0.21, 0.47) * | 0.42 (0.24, 0.72) *    |
| <b>Occupation</b>            |                   |                      |                     |                        |
| Farmers                      | 60                | 45                   | 1.00                | 1.00                   |
| Housewives                   | 55                | 42                   | 1.31(0.72, 2, 34)   | 0.87 (0.32, 2.44)      |
| Civil servants               | 21                | 38                   | 0.41(0.21, 0.78) *  | 0.45 (0.13, 1.53)      |
| Students                     | 9                 | 24                   | 0.25 (0.11, 0.59) * | 0.33 (0.10, 1.08)      |
| Unemployed                   | 27                | 23                   | 0.71(0.37, 1.36)    | 0.78 (0.29, 2.09)      |
| Self employed                | 18                | 27                   | 0.48 (0.24, 0.99) * | 0.45 (0.15, 1.3)       |
| <b>Marriage</b>              |                   |                      |                     |                        |
| Single                       | 59                | 75                   | 1.00                | 1.00                   |
| Divorced                     | 39                | 50                   | 0.99 (0.57, 1.70)   | 0.89 (0.45, 1.6)       |
| Married                      | 85                | 55                   | 1.96 (1.2, 3.17)    | 1.61 (0.87, 2.94)      |
| Widowed                      | 7                 | 14                   | 0.64 (0.24, 1.67)   | 0.60 (0.19, 1.83)      |
| <b>Education</b>             |                   |                      |                     |                        |
| Illiterate                   | 102               | 55                   | 1.00                | 1.00                   |
| 1-8 <sup>th</sup> grade      | 65                | 80                   | 0.43 (0.27, 0.69) * | 0.56 (0.33, 0.97) *    |
| 9 <sup>th</sup> and above    | 23                | 59                   | 0.21 (0.12, 0.37) * | 0.40 (0.20, 0.81) *    |
| <b>Health provider visit</b> |                   |                      |                     |                        |
| Non-formal                   | 143               | 94                   | 1.00                | 1.00                   |
| Formal                       | 47                | 100                  | 0.31 (0.20, 0.47) * | 0.35 (0.21, 0.57) *    |
| <b>Income</b>                |                   |                      |                     |                        |
| No income                    | 98                | 87                   | 1.00                | 1.00                   |
| Irregular income             | 56                | 58                   | 0.85 (0.54, 1.36)   | 0.65 (0.28, 1.54)      |
| 1-300 Birr                   | 21                | 15                   | 1.24 (0.60, 2.56)   | 2.11 (0.77, 5.7)       |
| >301Birr                     | 15                | 34                   | 0.39 (0.20, 0.76) * | 0.79 (0.26, 2.41)      |
| <b>Medical provider</b>      |                   |                      |                     |                        |
| Clinic/HP                    | 38                | 39                   | 1.00                | 1.00                   |
| Health center                | 86                | 77                   | 1.14 (0.67, 1.97)   | 1.08 (0.56, 2.06)      |
| Hospital                     | 25                | 27                   | 0.95 (0.47, 1.92)   | 1.29 (0.56, 3.00)      |
| Private medical provider     | 41                | 51                   | 0.89 (0.45, 1.51)   | 1.26 (0.61, 2.60)      |

\* Significant at &lt;0.05

Income group: 1) no income (housewife, students, unemployed); 2) irregular income (farmers); 3) regular income of 1-300 Birr per month (civil servants); 4) regular income of &gt;300 Birr per month (civil servants).
